# Supplementary material
Source: PubMed Central journal article supplement (PMC3198328)
Supplement: 1113227108_pnas.201113227SI.pdf [file 1113227108_pnas.201113227SI.pdf]

# Supporting Information

Tatineni et al. 10.1073/pnas.1113227108

**Table S1. Biological indexing of CTV deletion mutants on selected susceptible varieties of citrus**

| Mutant           | Plant no. | <i>C. macrophylla</i> | Mexican lime | Madam vinous | <i>C. indica</i> | <i>C. hystrix</i> | <i>C. micrantha</i> | Persian lime | Citron      |
|------------------|-----------|-----------------------|--------------|--------------|------------------|-------------------|---------------------|--------------|-------------|
| CTV9             | 1         | 2.84 ± 0.03           | 3.11 ± 0.07  | 3.38 ± 0.02  | 1.82 ± 0.00      | 0.98 ± 0.01       | 1.52 ± 0.08         | 0.93 ± 0.03  | 1.77 ± 0.18 |
|                  | 2         | 1.83 ± 0.16           | 3.25 ± 0.06  | 3.37 ± 0.04  | 1.62 ± 0.00      | 0.97 ± 0.02       | 1.62 ± 0.03         | 1.60 ± 0.08  | 1.56 ± 0.18 |
|                  | 3         | 2.15 ± 0.03           | 3.18 ± 0.00  | 3.15 ± 0.21  | 1.13 ± 0.02      | —                 | —                   | —            | —           |
| CTV9Δp33         | 1         | 3.05 ± 0.08           | 3.33 ± 0.06  | 2.56 ± 0.03  | 1.33 ± 0.01      | 1.25 ± 0.02       | 1.67 ± 0.06         | 1.08 ± 0.06  | 1.69 ± 0.22 |
|                  | 2         | 2.63 ± 0.07           | 3.30 ± 0.04  | 2.99 ± 0.10  | 2.12 ± 0.22      | 1.27 ± 0.04       | 1.49 ± 0.00         | 0.40 ± 0.02  | 1.50 ± 0.28 |
|                  | 3         | 2.66 ± 0.10           | 3.32 ± 0.06  | 3.26 ± 0.12  | 1.51 ± 0.19      | —                 | —                   | —            | —           |
| CTV9Δp18         | 1         | 1.74 ± 0.28           | 3.33 ± 0.02  | 3.34 ± 0.19  | 0.98 ± 0.03      | 0.49 ± 0.00       | 0.60 ± 0.03         | 0.30 ± 0.00  | 0.80 ± 0.13 |
|                  | 2         | 1.78 ± 0.08           | 3.27 ± 0.06  | 2.94 ± 0.33  | 1.03 ± 0.01      | 0.58 ± 0.06       | 0.52 ± 0.00         | 0.33 ± 0.05  | 0.58 ± 0.11 |
|                  | 3         | 1.86 ± 0.04           | 3.17 ± 0.05  | 2.94 ± 0.15  | 0.94 ± 0.01      | —                 | —                   | —            | —           |
| CTV9Δp13         | 1         | 3.00 ± 0.00           | 3.24 ± 0.02  | 2.51 ± 0.12  | 1.14 ± 0.00      | 0.95 ± 0.06       | 0.46 ± 0.00         | 0.48 ± 0.03  | 1.22 ± 0.32 |
|                  | 2         | 3.02 ± 0.07           | 3.27 ± 0.03  | 2.07 ± 0.08  | 1.46 ± 0.01      | 0.95 ± 0.04       | 1.67 ± 0.01         | 0.80 ± 0.00  | 1.29 ± 0.40 |
|                  | 3         | 3.14 ± 0.17           | 3.26 ± 0.06  | 2.62 ± 0.20  | 1.03 ± 0.01      | —                 | —                   | —            | —           |
| CTV9Δp33Δp18     | 1         | 2.03 ± 0.01           | 3.28 ± 0.02  | 1.44 ± 0.06  | 2.47 ± 0.00      | 0.75 ± 0.03       | 1.16 ± 0.07         | 1.17 ± 0.04  | 0.92 ± 0.18 |
|                  | 2         | 1.98 ± 0.30           | 3.24 ± 0.03  | 3.42 ± 0.10  | 1.60 ± 0.01      | 0.84 ± 0.01       | 0.99 ± 0.02         | 0.94 ± 0.05  | 0.65 ± 0.14 |
|                  | 3         | 2.81 ± 0.05           | 3.16 ± 0.01  | 2.02 ± 0.02  | 2.24 ± 0.01      | —                 | —                   | —            | —           |
| CTV9Δp33Δp13     | 1         | 2.61 ± 0.00           | 3.17 ± 0.08  | 2.14 ± 0.04  | 1.03 ± 0.02      | 1.26 ± 0.03       | 2.05 ± 0.11         | 0.60 ± 0.02  | 0.86 ± 0.01 |
|                  | 2         | 2.57 ± 0.15           | 0.21 ± 0.00  | 3.34 ± 0.04  | 0.56 ± 0.00      | 0.71 ± 0.02       | —                   | 0.53 ± 0.01  | 0.88 ± 0.05 |
|                  | 3         | 3.07 ± 0.06           | 3.21 ± 0.03  | 1.02 ± 0.08  | 1.03 ± 0.01      | —                 | —                   | —            | —           |
| CTV9Δp18Δp13     | 1         | 2.23 ± 0.02           | 3.13 ± 0.03  | 1.61 ± 0.01  | 1.02 ± 0.01      | 1.26 ± 0.03       | 1.35 ± 0.02         | 0.97 ± 0.03  | 0.27 ± 0.05 |
|                  | 2         | 2.6 ± 0.04            | 3.04 ± 0.01  | 2.76 ± 0.25  | 1.96 ± 0.03      | 1.79 ± 0.02       | 1.11 ± 0.03         | 0.83 ± 0.00  | 0.49 ± 0.03 |
|                  | 3         | 2.47 ± 0.04           | —            | 1.37 ± 0.08  | 1.04 ± 0.01      | —                 | —                   | —            | —           |
| CTV9Δp33Δp13Δp18 | 1         | 2.10 ± 0.00           | 3.28 ± 0.04  | 0.94 ± 0.04  | 0.57 ± 0.00      | 0.98 ± 0.03       | 0.67 ± 0.02         | 0.44 ± 0.02  | 0.51 ± 0.02 |
|                  | 2         | 2.80 ± 0.12           | 3.26 ± 0.05  | 2.12 ± 0.11  | 1.60 ± 0.01      | 0.71 ± 0.00       | 1.11 ± 0.03         | 0.58 ± 0.01  | 0.79 ± 0.03 |
|                  | 3         | 2.78 ± 0.00           | 3.23 ± 0.04  | 1.45 ± 0.08  | 2.38 ± 0.05      | —                 | —                   | —            | —           |
| Healthy          | 1         | 0.08 ± 0.01           | 0.03 ± 0.00  | 0.12 ± 0.00  | 0.13 ± 0.00      | 0.081 ± 0.00      | 0.09 ± 0.00         | 0.06 ± 0.00  | 0.07 ± 0.00 |
|                  | 2         | 0.07 ± 0.00           | 0.03 ± 0.00  | 0.09 ± 0.00  | 0.10 ± 0.00      | —                 | 0.08 ± 0.00         | —            | 0.08 ± 0.00 |
|                  | 3         | 0.09 ± 0.01           | 0.03 ± 0.00  | 0.08 ± 0.00  | 0.11 ± 0.01      | —                 | —                   | —            | —           |

Citrus plants inoculated with CTV9 and its deletion mutants were assayed at 8 wk after inoculation by double antibody sandwich indirect ELISA. ELISA values (A405) are averages for three wells ± SDs.
